# Supplementary material for: Photophysical and NMR studies of encapsulation of 2-cyano-6-hydroxy benzothiazole in p-sulfonatocalix[6]arene and its biological applications
Source: Royal Society of Chemistry journal article supplement (doi:10.1039/d1an00770j), 2021-01-01
Supplement: d1an00770j1.pdf [file d1an00770j1.pdf]

## Supporting Information

### Photophysical, NMR studies of encapsulation of 2-cyano-6-hydroxy benzothiazole in p-sulfonatocalix[6]arene and its biological applications

Ankita S. Jadhav, Ashvini U. Chaudhari, Kisan M. Kodam, Dipalee D. Malkhede\*

Department of Chemistry, Savitribai Phule Pune University, Pune-411007, India

NMR spectra (in DMSO-d<sub>6</sub>) of SCX6, CHBT and CHBT-SCX6 complex

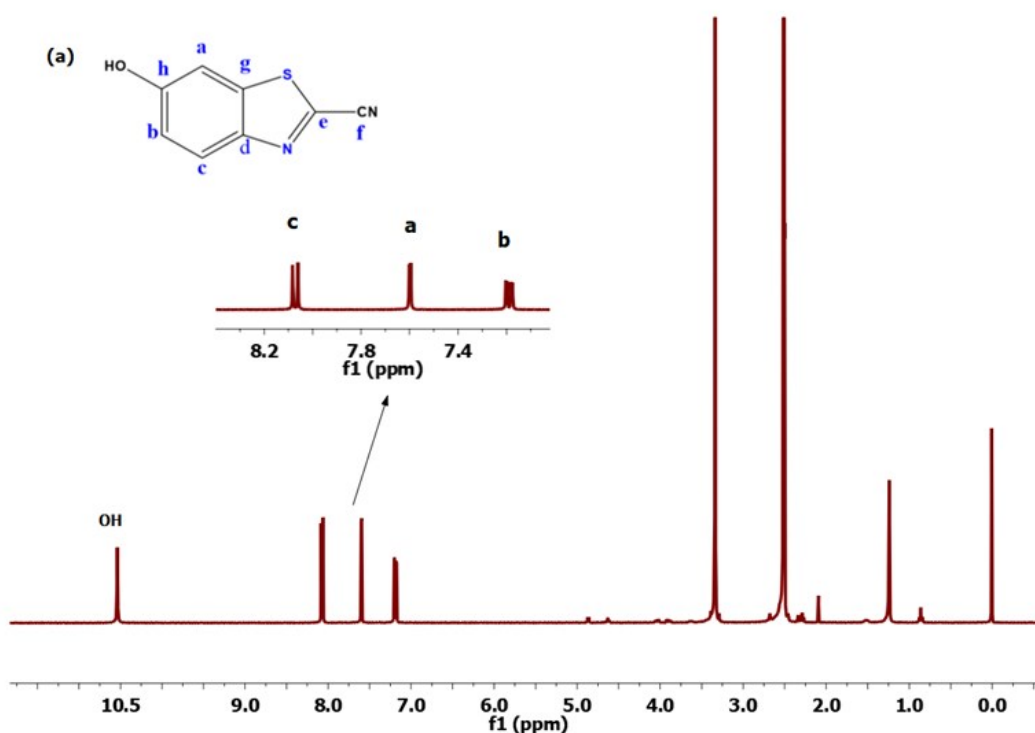

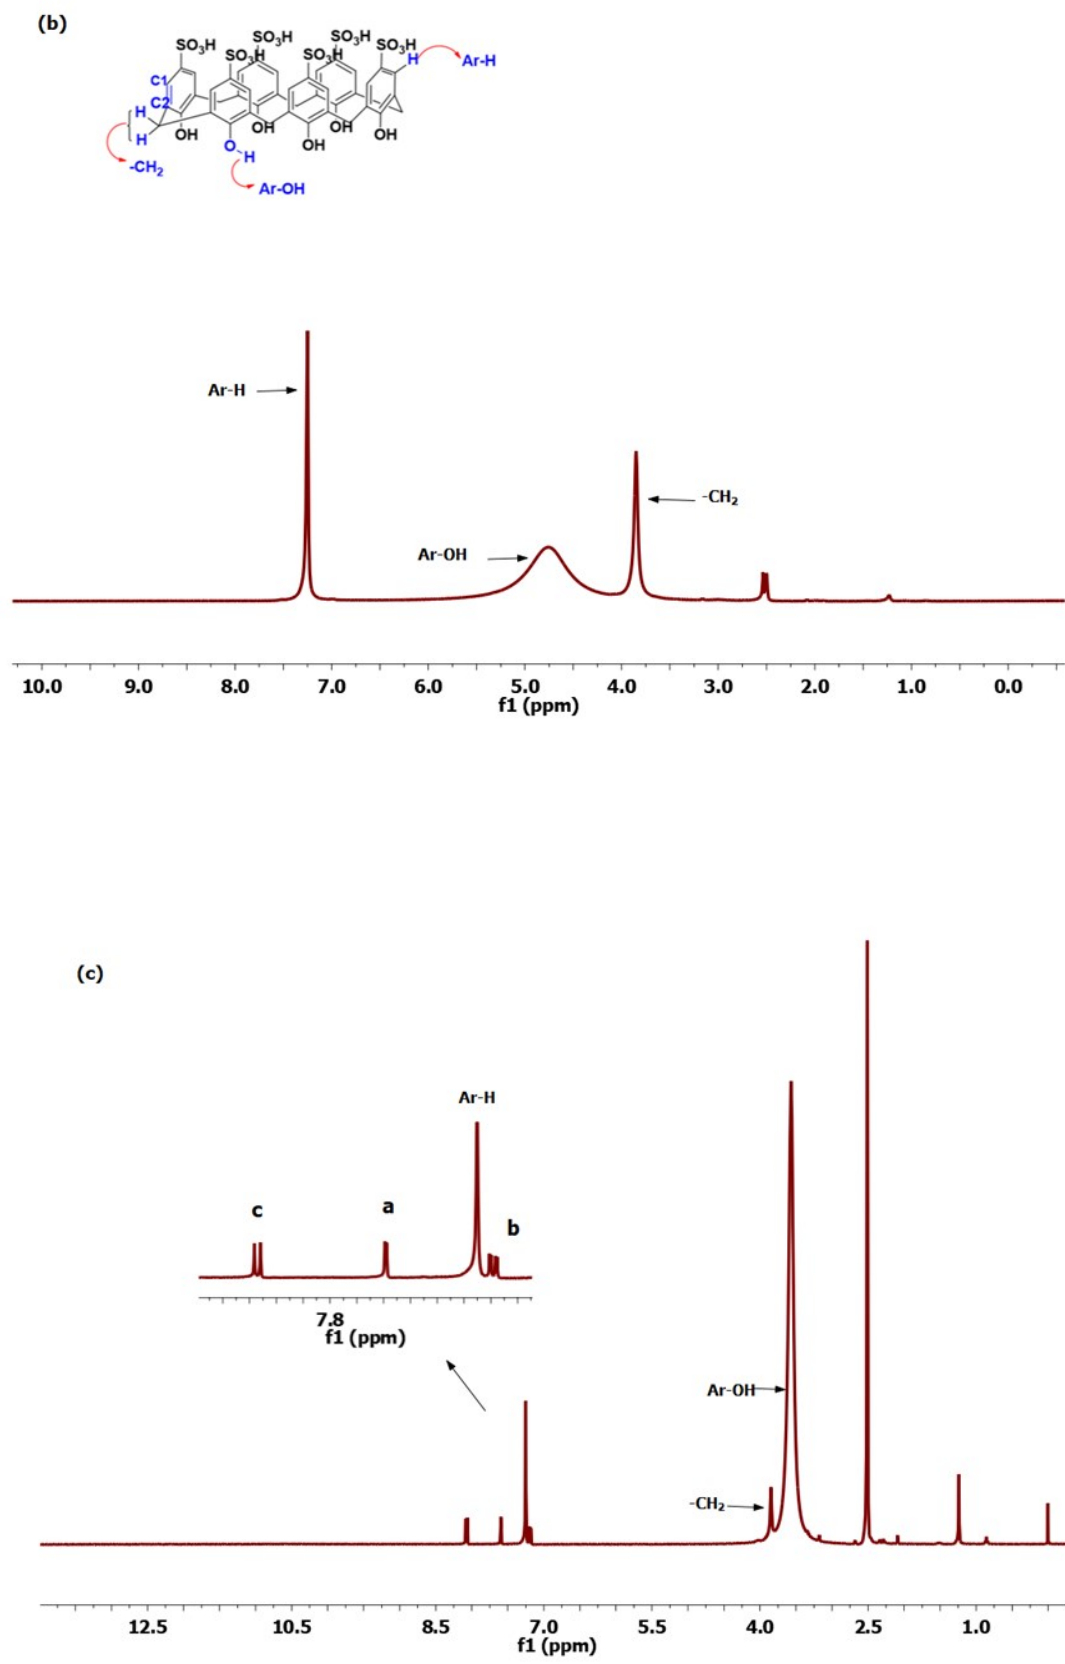

Fig.1S.  $^1\text{H}$  NMR spectra of a) CHBT b) SCX6, and c) 1:1 mole ratio of CHBT-SCX6 complex in DMSO- $d_6$  at 25  $^\circ\text{C}$ .

**Table 1S** Chemical shifts along with  $\Delta\delta$  for SCX6 (0.01M), CHBT (0.01M) and CHBT-SCX6 in DMSO-d<sub>6</sub>.

| Protons assignment | Chemical shift |            | $(\Delta\delta = \delta - \delta_0)$ |
|--------------------|----------------|------------|--------------------------------------|
|                    | $\delta_0$     | $\delta$   | (ppm)<br>$\Delta\delta$              |
| a                  | 7.59           | 7.58       | -0.01                                |
| b                  | 7.18           | 7.18       | 0                                    |
| c                  | 8.06           | 8.06       | 0                                    |
| OH                 | 10.53          | Peak merge |                                      |
| Ar-H               | 7.25           | 7.24       | -0.01                                |
| Ar-OH              | 4.76           | 3.56       | -1.19                                |
| Ar-CH <sub>2</sub> | 3.85           | 3.84       | -0.01                                |

<sup>1</sup>H NMR spectra of CHBT-SCX6 complexes along with those of individual host and CHBT have been recorded and results are shown in figure 2S (supporting information). The NMR spectrum of SCX6 (figure 2S(a) and 3S(a) exhibit signals at  $\delta = 3.82$  ppm (-CH<sub>2</sub>: methylene hydrogen),  $\delta = 7.27$  ppm (Ar-H: aromatic hydrogen). In the CHBT spectrum (figure 2S(b) and 3S(b), the doublet due to CH (c) (a) ( $\delta = 8.03$  ppm and  $\delta = 7.48$  ppm) and doublet of doublet ( $\delta = 7.15$  ppm) assigned to CH (b). Thus, figure 2S(c) and 3S(c) shows that there is a very small change in the chemical shift values of SCX6 and CHBT protons, table 2S (supporting information).

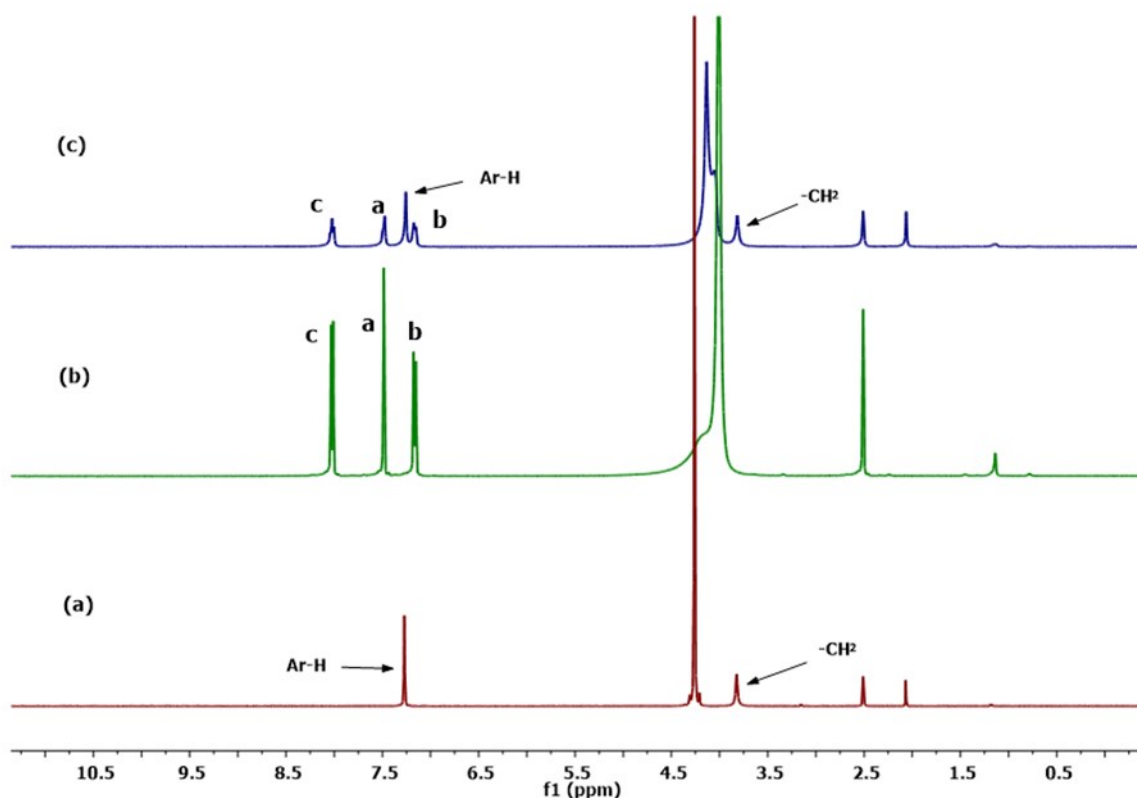

**Fig. 2S** <sup>1</sup>H NMR spectra of a) SCX6, b) CHBT and c) CHBT-SCX6 in small amount of DMSO-d<sub>6</sub> in D<sub>2</sub>O.

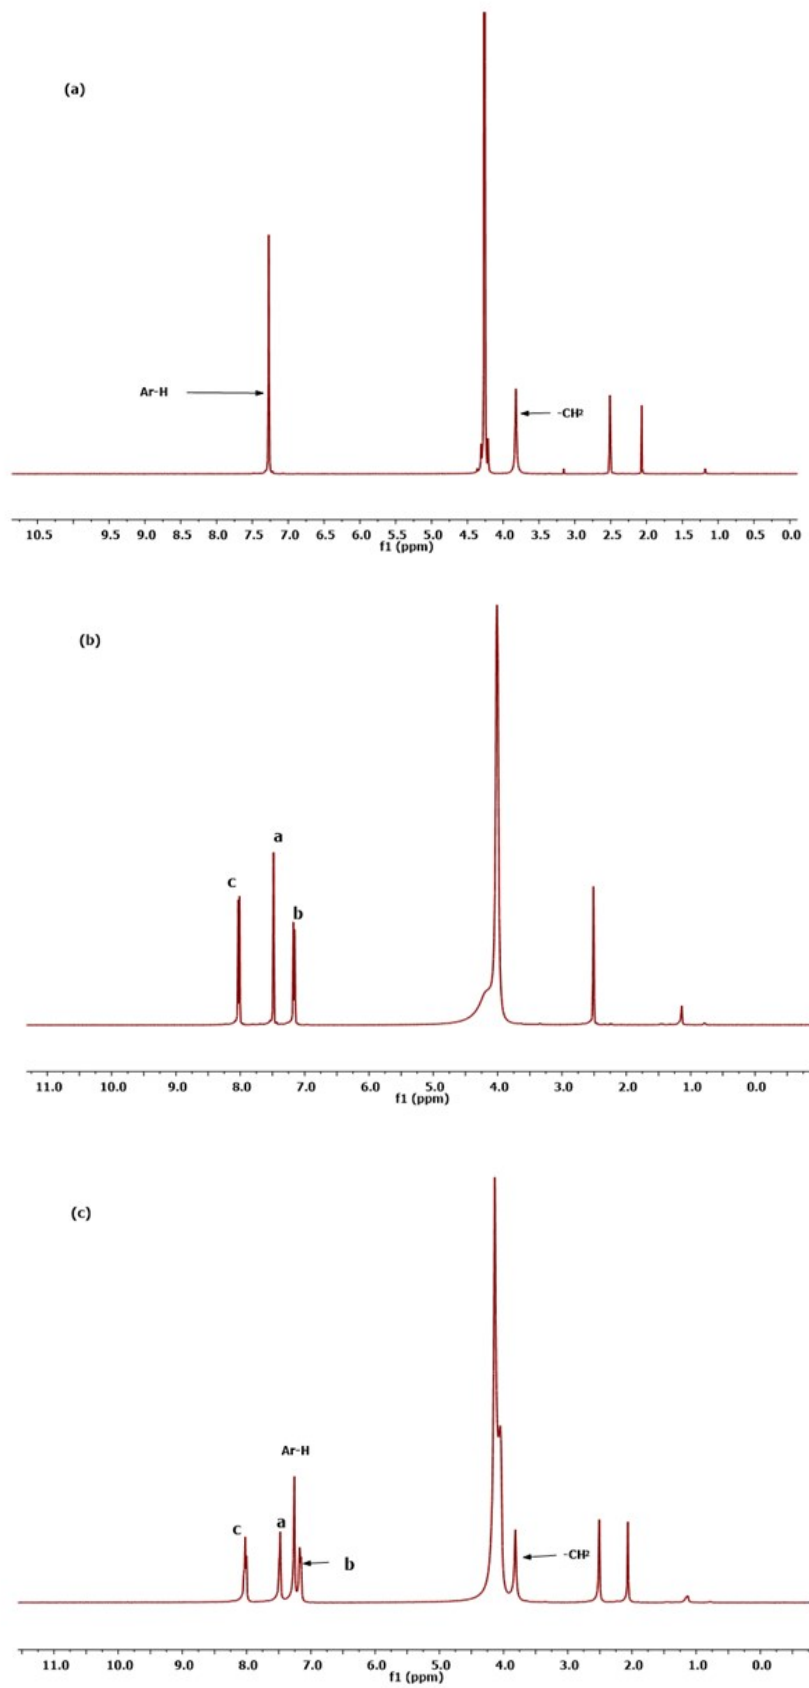

**Fig.35**  $^1\text{H}$  NMR spectra of a) SCX6, b) CHBT and c) 1:1 mole ratio of CHBT-SCX6 complex in small amount of  $\text{DMSO-d}_6$  in  $\text{D}_2\text{O}$ .

**Table. 2S** <sup>1</sup>H NMR chemical shifts along with  $\Delta\delta$  for SCX6 (0.01M), CHBT (0.01M) and CHBT-SCX6 in small amount of DMSO-d<sub>6</sub> in D<sub>2</sub>O.

| Proton assignment  | Chemical shift |          | ( $\Delta\delta = \delta - \delta_0$ ) (ppm) |
|--------------------|----------------|----------|----------------------------------------------|
|                    | $\delta_0$     | $\delta$ | $\Delta\delta$                               |
| a                  | 7.48           | 7.48     | 0                                            |
| b                  | 7.15           | 7.16     | 0.01                                         |
| c                  | 8.03           | 8.02     | -0.01                                        |
| Ar-H               | 7.27           | 7.26     | -0.01                                        |
| Ar-CH <sub>2</sub> | 3.82           | 3.81     | -0.01                                        |

<sup>1</sup>H NMR experiment of CHBT in DMSO-d<sub>6</sub> at pD 2.0 and pD 9.5 and results are shown in figure 4S, 5S (supporting information). The results match with the absorbance and fluorescence spectra. The CHBT remains neutral at pD 2.0, as there is no change in the chemical shift values of CHBT protons relative to neutral pD. While at pD = 9.5 there is change in chemical shift values (upfield shift) in the CHBT protons with deprotonation of hydroxyl proton shown in table 3S (supporting information).

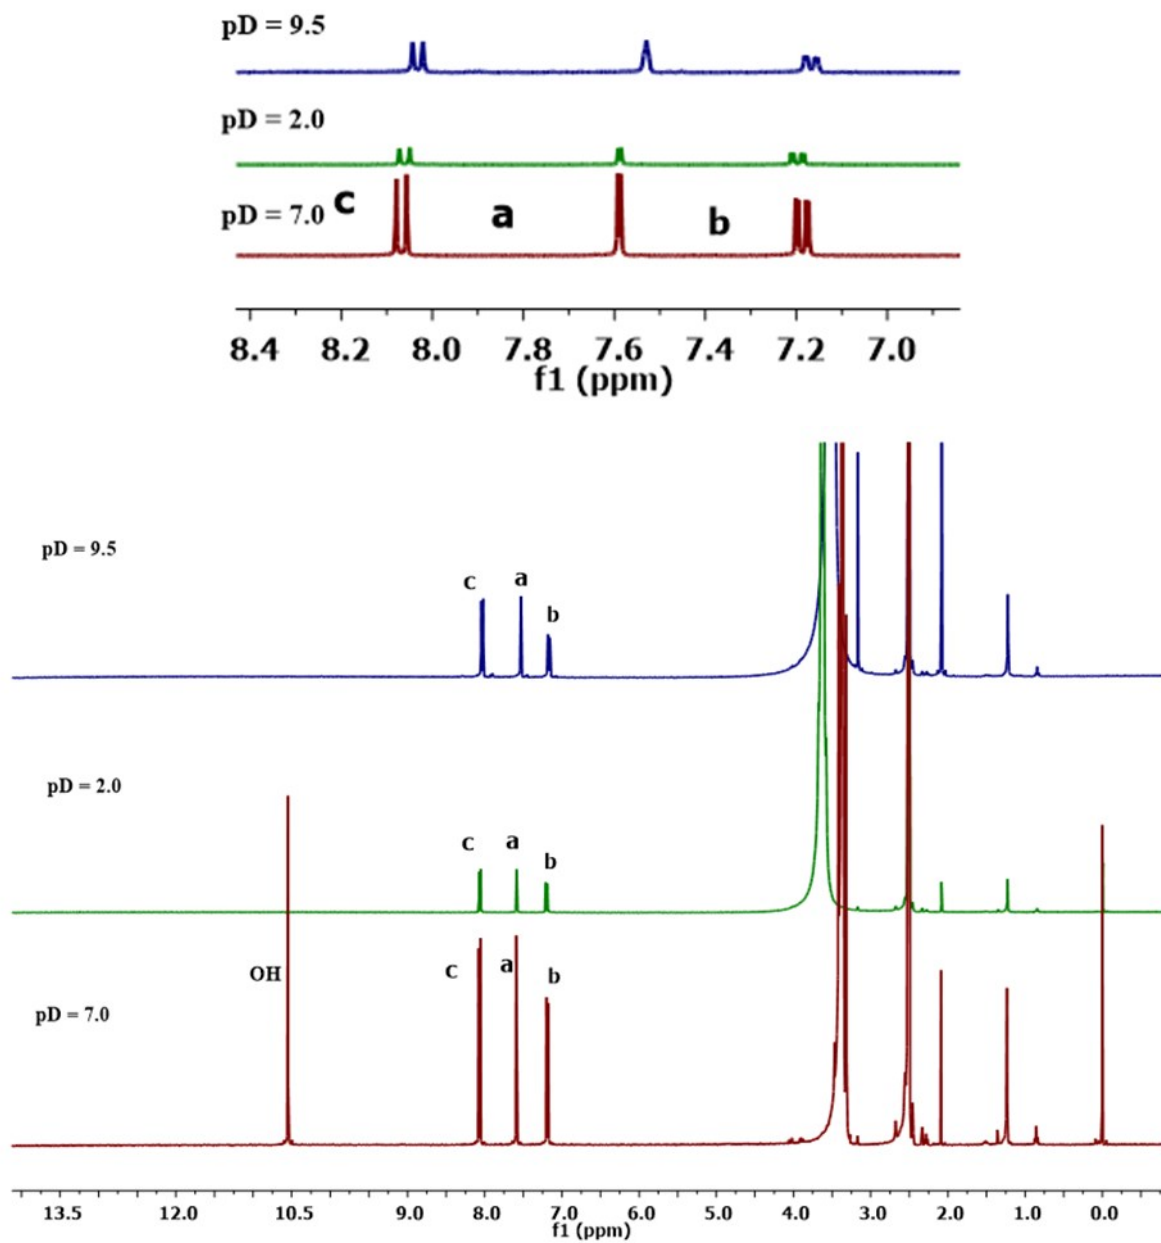

Fig. 4S  $^1\text{H}$  NMR spectra of CHBT (0.01 M) in  $\text{DMSO-d}_6$  at pD 7.0, 2.0 and 9.5.

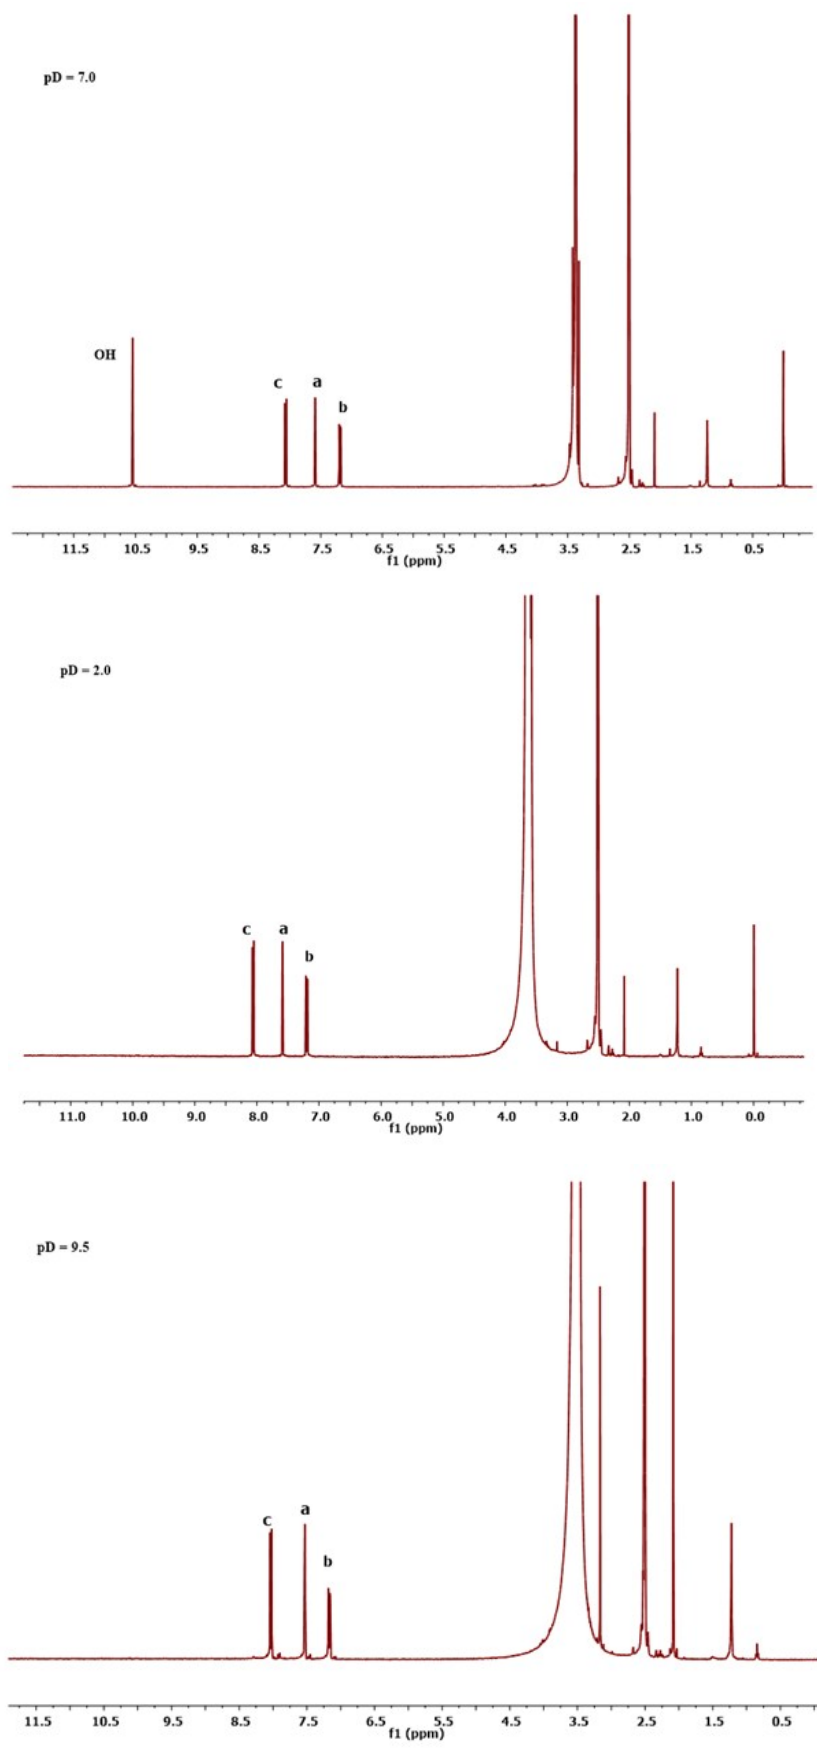

Fig. 5S <sup>1</sup>H NMR spectra of CHBT (0.01 M) in DMSO-d<sub>6</sub> at pD 7.0, 2.0 and 9.5.

**Table 3S**  $^1\text{H}$  NMR chemical shifts along with the change from neutral to basic conditions ( $\Delta\delta$ ) for CHBT (0.01M) in  $\text{DMSO-d}_6$  at pD 7.0, 2.0 and 9.5.

| Proton assignment | Chemical shift      |                   |                   | $(\Delta\delta = \delta - \delta_0)$ (ppm) |
|-------------------|---------------------|-------------------|-------------------|--------------------------------------------|
|                   | $\delta_0$ (pD 7.0) | $\delta$ (pD 2.0) | $\delta$ (pD 9.5) | $\Delta\delta$ (pD 9.5)                    |
| a                 | 7.59                | 7.59              | 7.49              | -0.1                                       |
| b                 | 7.19                | 7.19              | 7.13              | -0.06                                      |
| c                 | 8.06                | 8.06              | 8.03              | -0.03                                      |
| OH                | 10.55               | -                 | -                 | -                                          |

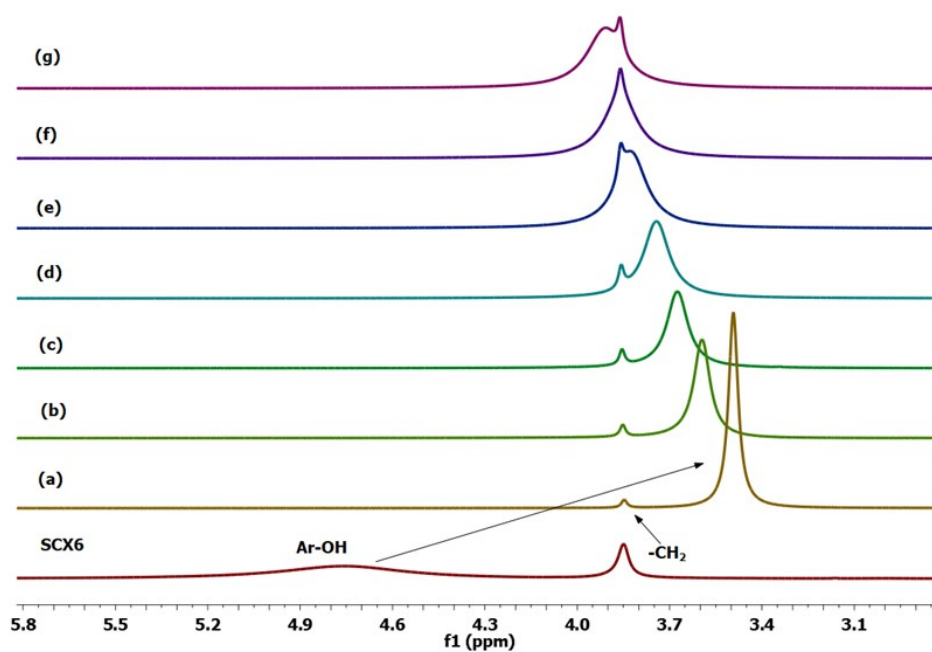

**Fig. 6S.** Partial  $^1\text{H}$  NMR spectra titration spectra (400 MHz, 25°C) recorded in  $\text{DMSO-d}_6$  of CHBT at the concentration of 0.01 M upon addition of SCX6 (0.01M), SCX6, (a) 5:1 equi., (b) 3:1 equi., (c) 2:1 equi., (d) 1:1 equi., (e) 1:2 equi., (f) 1:3 equi., (g) 1:5 equi.



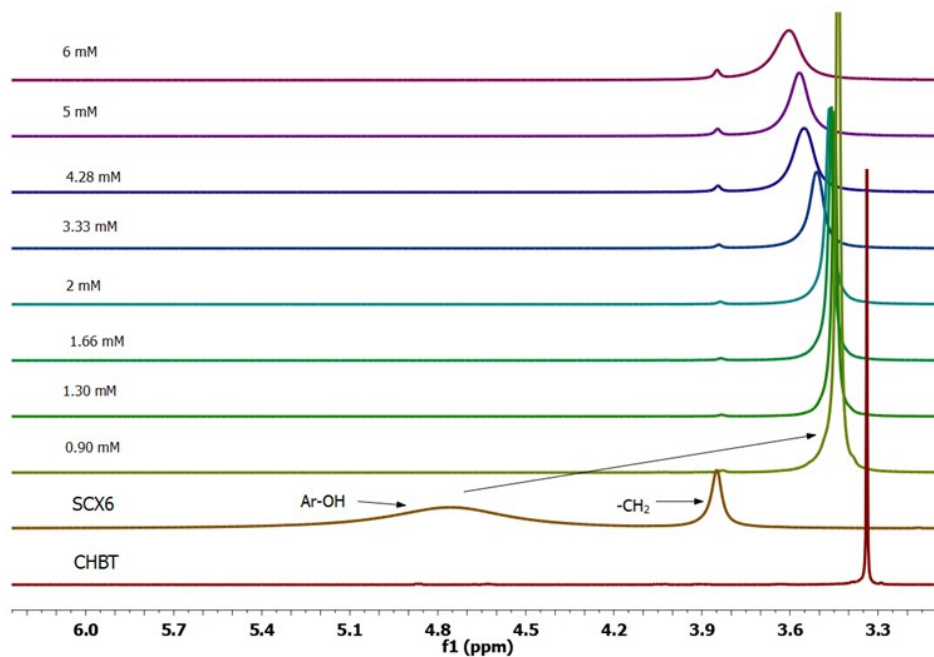

**Fig. 7S.** Partial  $^1\text{H}$  NMR spectra (400 MHz,  $\text{DMSO-d}_6$ , 298 K) of SCX6 at the concentration of 6 mM upon addition of CHBT: (1) 0.90 mM; (2) 1.30 mM; (3) 1.66 mM; (4) 2 mM; (5) 3.33 mM; (6) 4.28 mM; (7) 5 mM; (8) 6 mM.

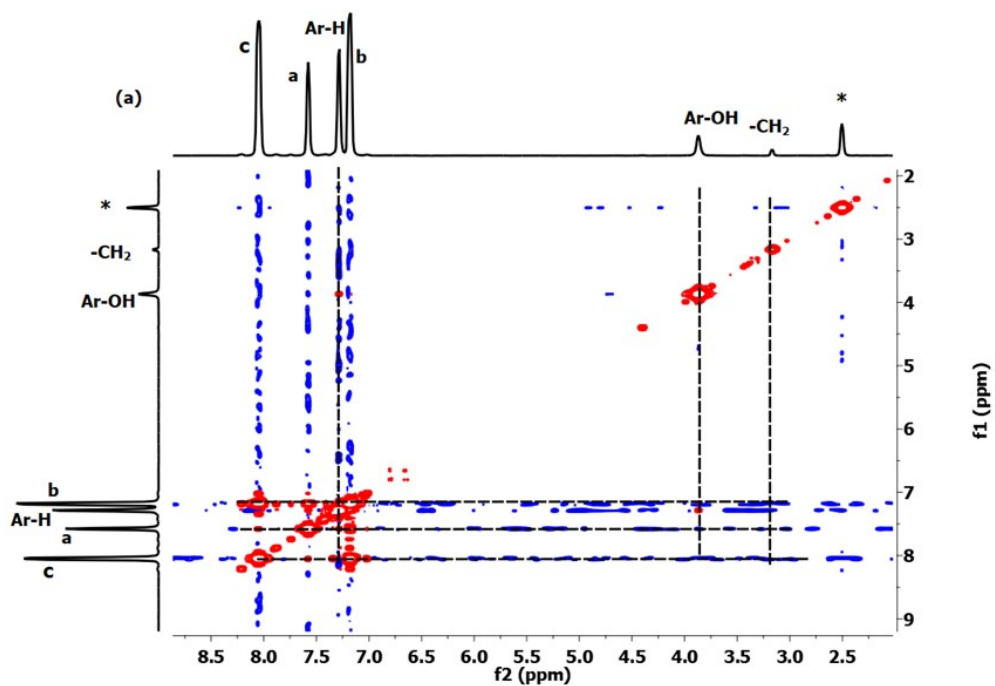

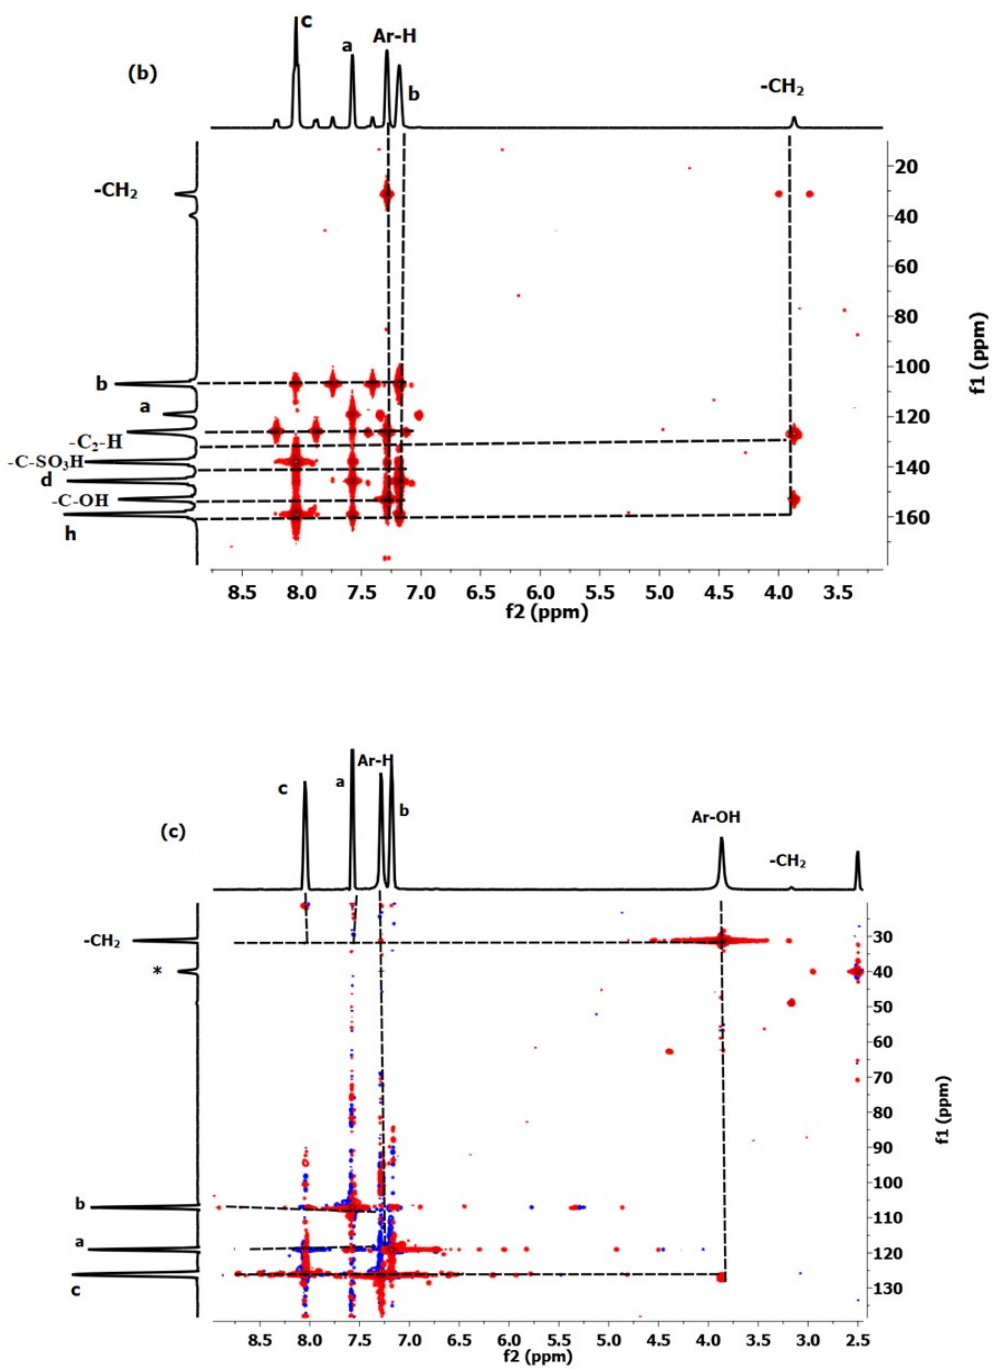

Fig.8S. 2D a) COSY b) HMBC and c) HSQC spectrum of CHBT-SCX6 1:1 complex in DMSO-d<sub>6</sub>.

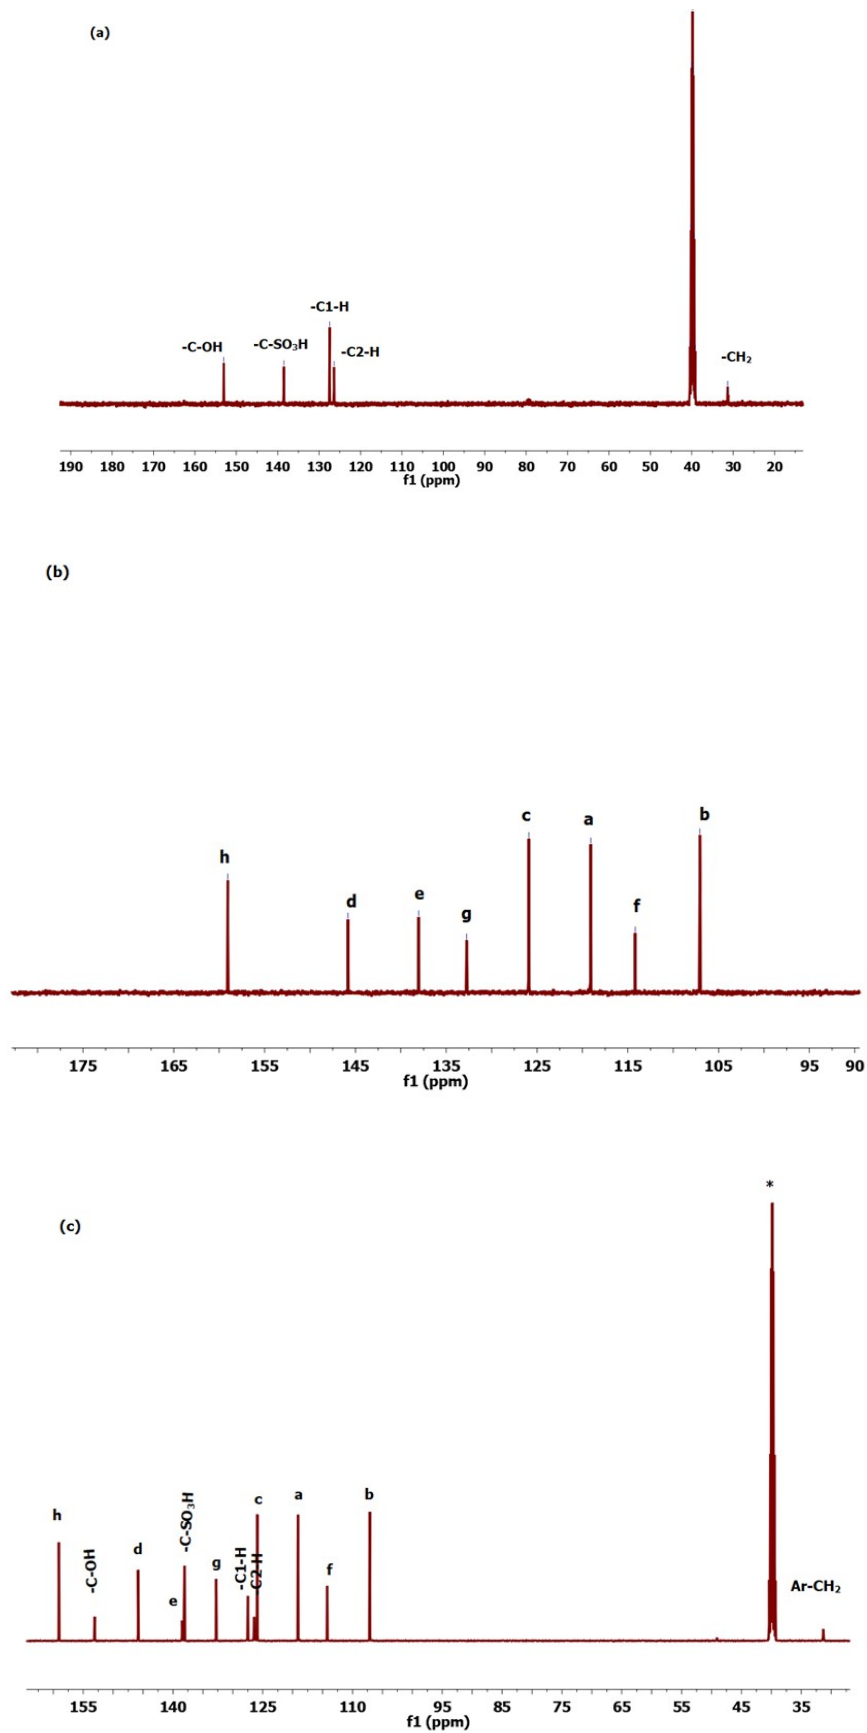

Fig.9S.  $^{13}\text{C}$  NMR spectrum of (a) SCX6, (b) CHBT, and (c) CHBT-SCX6 in  $\text{DMSO-d}_6$ .

**Table 4S** Chemical shifts along with  $\Delta\delta$  for CHBT, SCX6 and CHBT-SCX6 in DMSO- $d_6$

| Carbon Assignment    | Chemical Shift |          | ( $\Delta\delta = \delta - \delta_0$ ) |
|----------------------|----------------|----------|----------------------------------------|
|                      | $\delta_0$     | $\delta$ | (ppm)                                  |
| a                    | 119.08         | 119.11   | 0.03                                   |
| b                    | 107.06         | 107.11   | 0.05                                   |
| c                    | 125.90         | 125.91   | 0.01                                   |
| d                    | 145.83         | 145.82   | -0.01                                  |
| e                    | 138.03         | 138.06   | 0.03                                   |
| f                    | 114.18         | 114.23   | 0.05                                   |
| g                    | 132.75         | 132.79   | 0.04                                   |
| h                    | 159.05         | 159.07   | 0.02                                   |
| -C-OH                | 153.03         | 153.09   | 0.06                                   |
| -C-SO <sub>3</sub> H | 138.51         | 138.47   | -0.04                                  |
| -C <sub>1</sub> -H   | 127.45         | 127.48   | 0.03                                   |
| -C <sub>2</sub> -H   | 126.40         | 126.42   | 0.02                                   |
| Ar-CH <sub>2</sub>   | 31.24          | 31.32    | 0.08                                   |

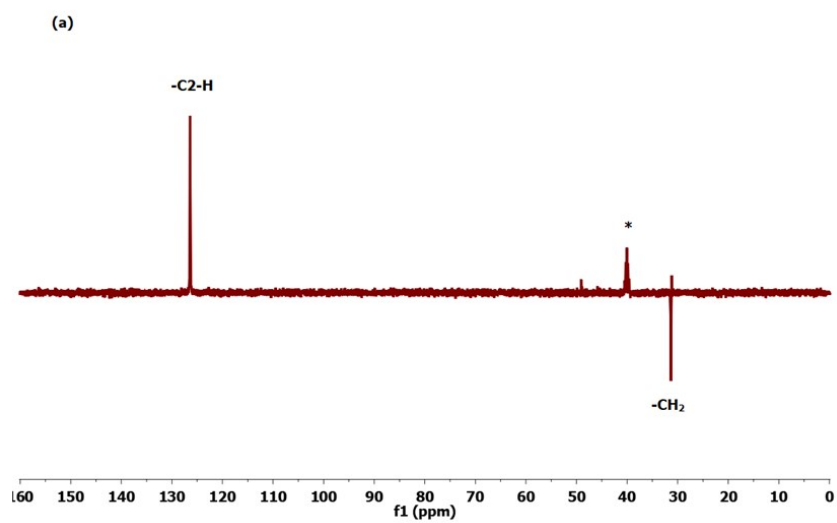

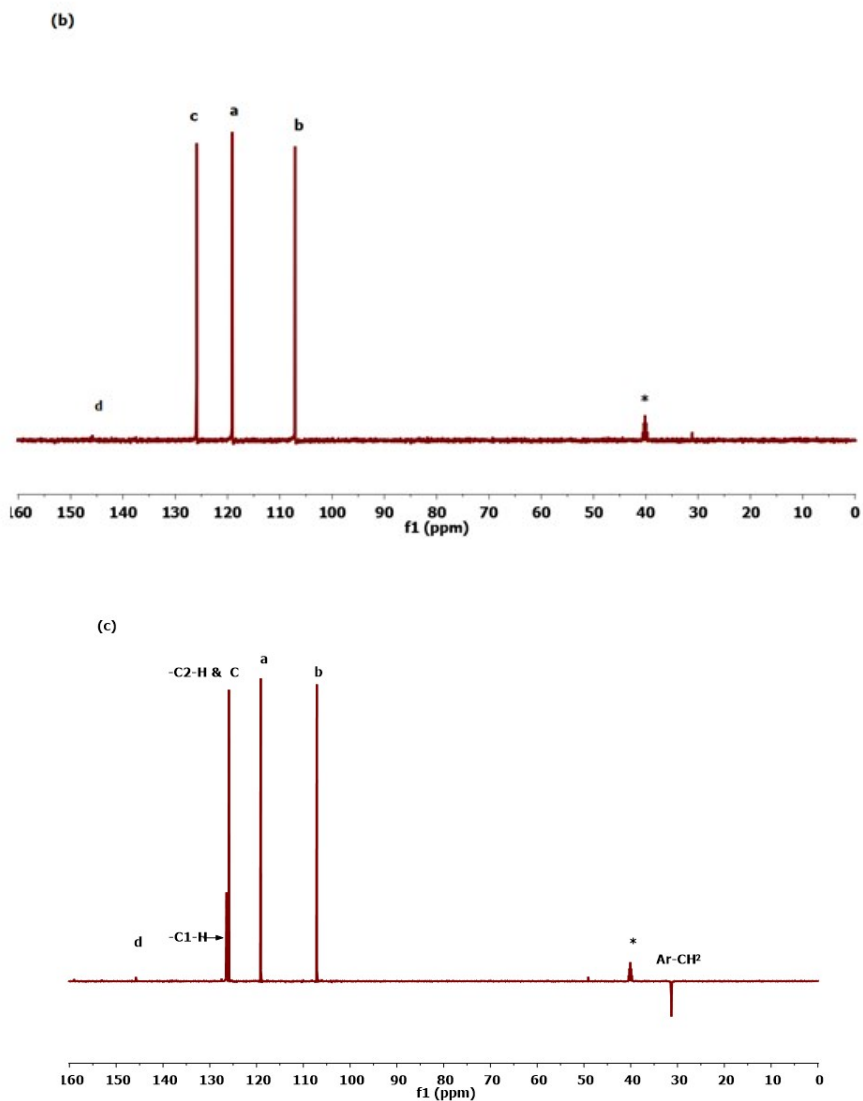

**Fig.10S.** DEPT spectra of (a) SCX6, (b) CHBT, and CHBT-SCX6 complex.

**Table 5S** Chemical shifts along with  $\Delta\delta$  for CHBT, SCX6 and CHBT-SCX6 in DMSO- $d_6$ .

| Carbon Assignment  | Chemical Shift |          | $(\Delta\delta = \delta - \delta_0)$ (ppm) |
|--------------------|----------------|----------|--------------------------------------------|
|                    | $\delta_0$     | $\delta$ | $\Delta\delta$                             |
| a                  | 119.08         | 119.11   | 0.03                                       |
| b                  | 107.06         | 107.11   | 0.05                                       |
| c                  | 125.90         | 125.91   | 0.01                                       |
| d                  | 145.79         | 145.82   | 0.03                                       |
| -C <sub>2</sub> -H | 126.39         | 126.42   | 0.03                                       |
| Ar-CH <sub>2</sub> | 31.25          | 31.32    | 0.07                                       |

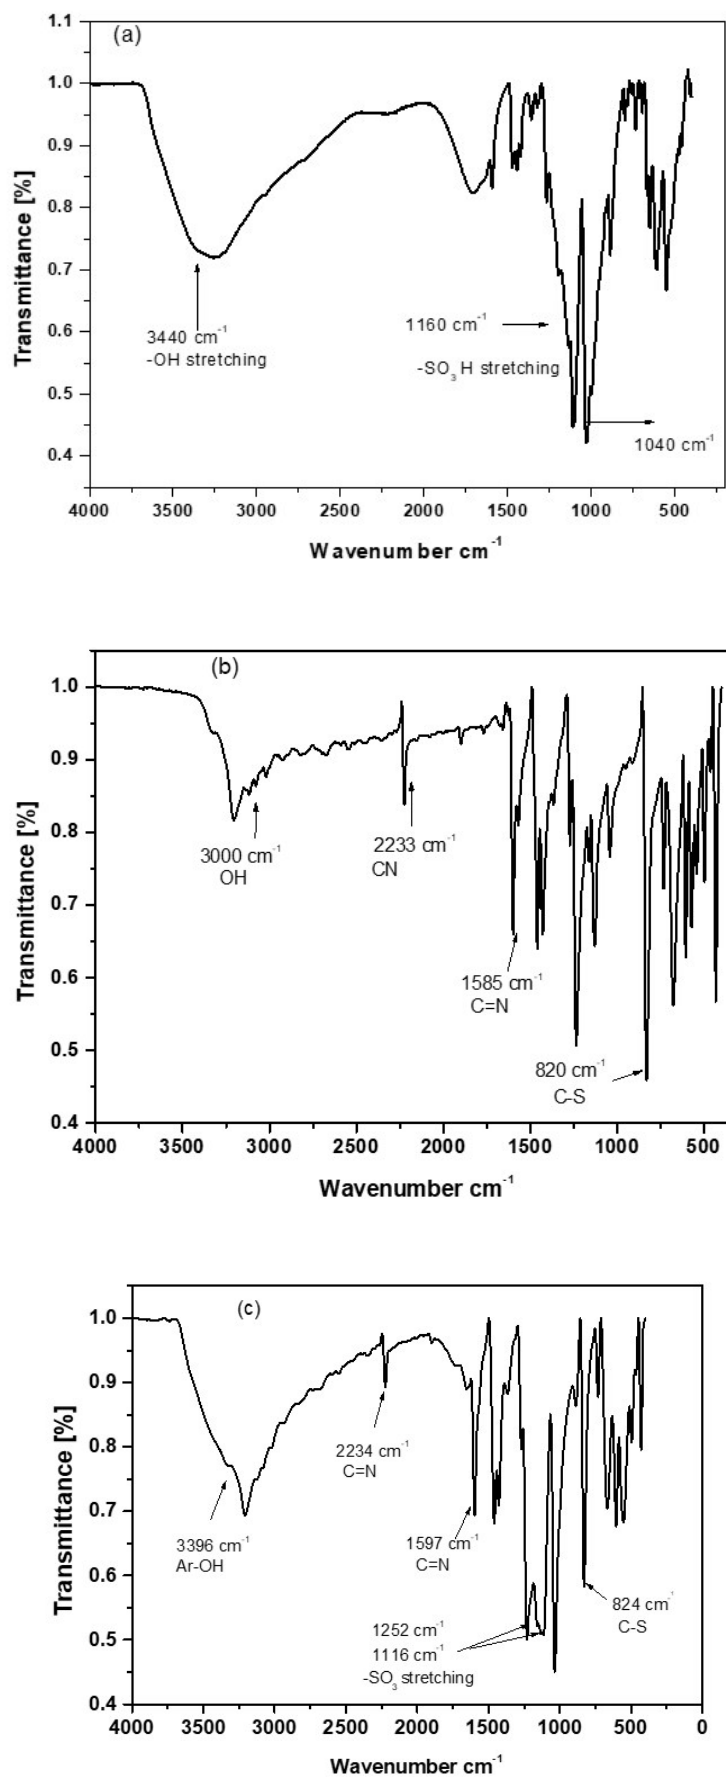

**Fig.11S.** FT-IR spectra of (a) SCX6 (b) CHBT and (c) CHBT-SCX6 complex in 1:1 mole ratio.

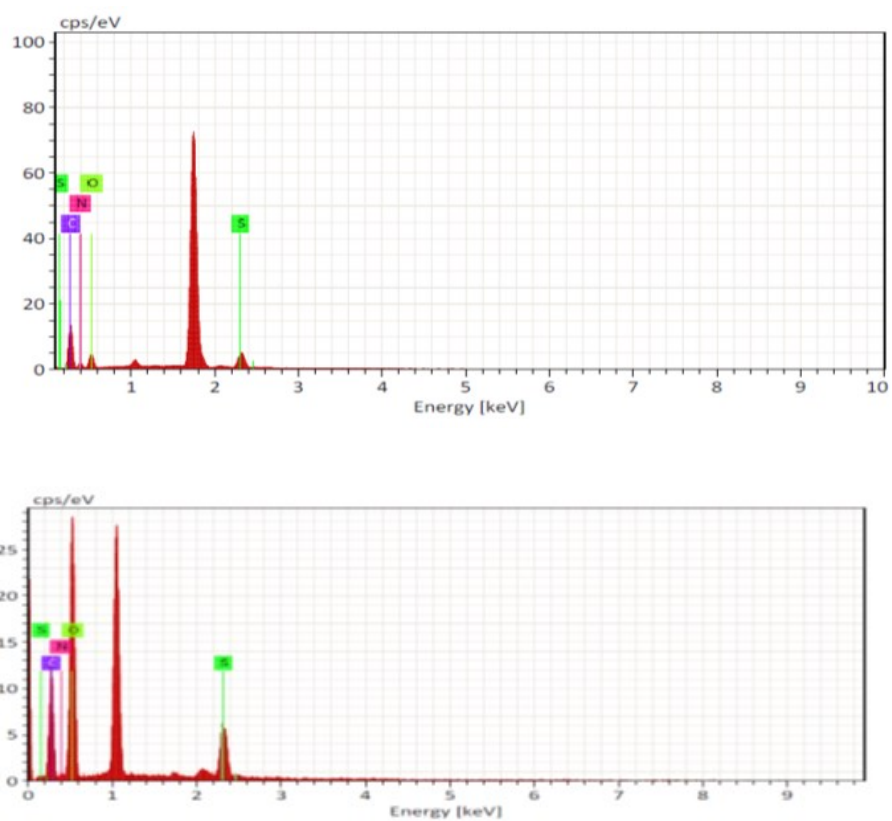

**Fig.12S.** EDS of (a) CHBT and (b) CHBT-SCX6 complex.

**Table.6S** EDS

|           | C (Atom %) | N (Atom %) | O (Atom %) | S (Atom %) |
|-----------|------------|------------|------------|------------|
| CHBT      | 57.88      | 17.33      | 19.19      | 5.60       |
| CHBT-SCX6 | 37.27      | 2.56       | 55.16      | 5.01       |
